# Supplementary material
Source: MDPI journal article supplement (https://www.mdpi.com/2311-5637/9/9/851)
Supplement: s1 [file s1]

# Enhanced Phycocyanobilin Production in *Escherichia coli* by Fusion-Expression of Apo-Proteins with Signal Peptides

Xiaolin Liu <sup>1,†</sup>, Jing Yu <sup>1,†</sup>, Qian Che <sup>1</sup>, Tianjiao Zhu <sup>1</sup>, Dehai Li <sup>1,2</sup> and Guojian Zhang <sup>1,2,3,\*</sup>

<sup>1</sup> Key Laboratory of Marine Drugs, Chinese Ministry of Education, School of Medicine and Pharmacy, Ocean University of China, Qingdao 266003, China; 17865327317@163.com (X.L.); cheqian064@ouc.edu.cn (Q.C.); zhutj@ouc.edu.cn (T.Z.); dehaili@ouc.edu.cn (D.L.)

<sup>2</sup> Laboratory for Marine Drugs and Bioproducts, Pilot National Laboratory for Marine Science and Technology, Qingdao 266237, China

<sup>3</sup> Laboratory of Marine Medicinal Resources Discovery, Marine Biomedical Research Institute of Qingdao, Qingdao 266075, China

\* Correspondence: zhangguojian@ouc.edu.cn; Tel.: +86-532-82032971

† These authors contributed equally to this work.

## Supporting Information

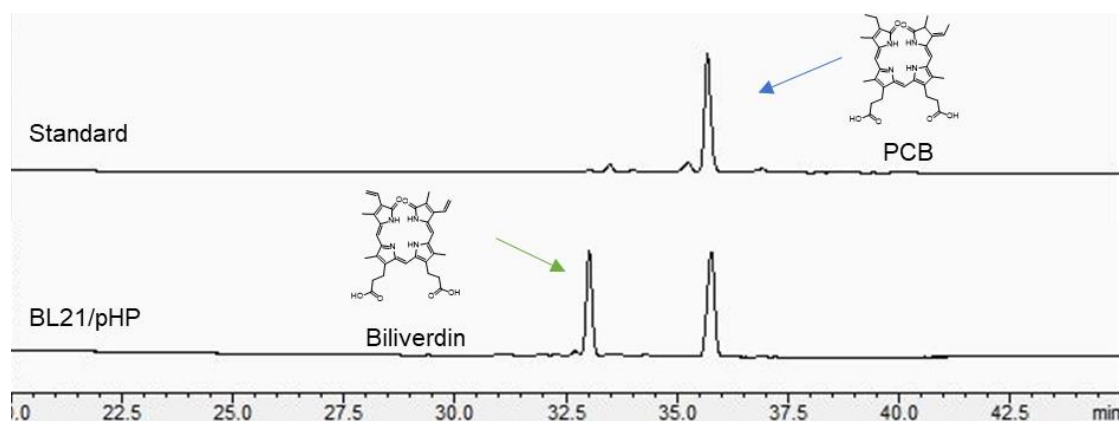

**Figure S1.** HPLC analysis of BL/pHP strain.

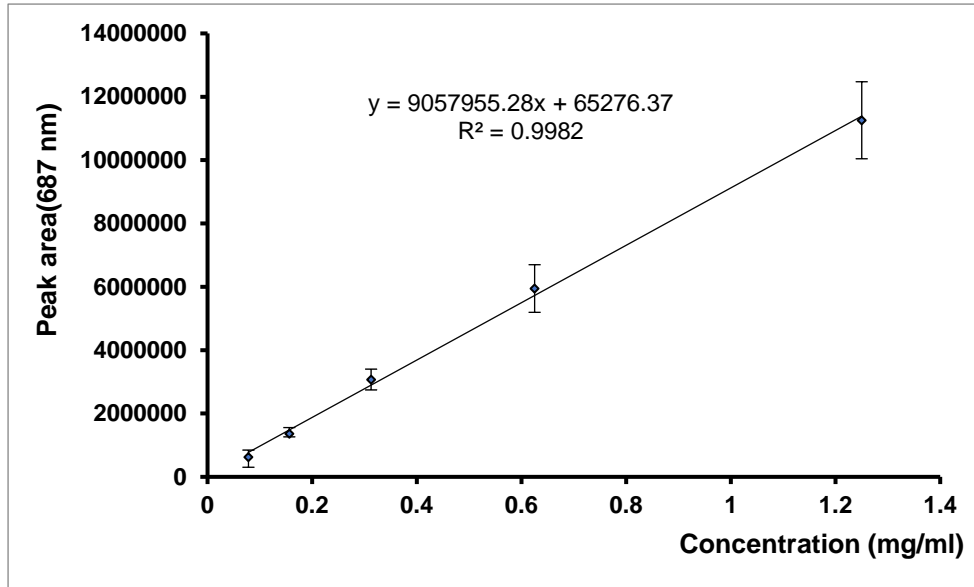

**Figure S2.** Standard curve for PCB using HPLC at 687 nm.

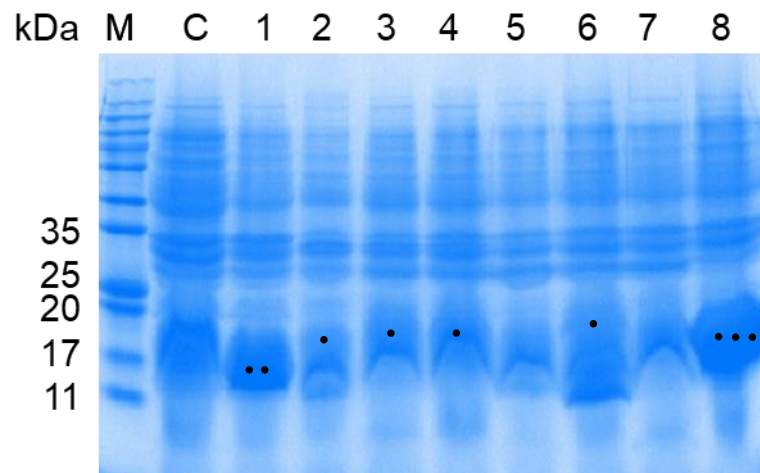

**Figure S3.** SDS-PAGE of expression of pET28a-sp-*cpcA*. M: Marker; C: Control, pET28a; Lanes: 1, pET28a-*cpcA*; 2, pET28a-pelB-*cpcA*; 3, pET28a-KP-SP-*cpcA*; 4, pET28a-PhoA-*cpcA*; 5, pET28a-OmpA-*cpcA*; 6, pET28a-MalE-*cpcA*; 7, pET28a-Lpp-*cpcA*; 8, pET28a-N20-*cpcA*.

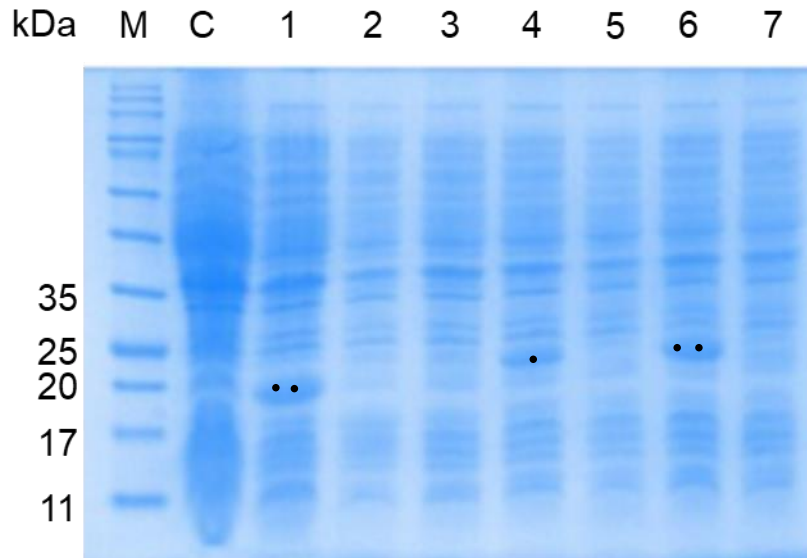

**Figure S1.** SDS-PAGE of expression of pET28a-sp-*cpcB*. M: Marker; C: Control, pET28a; Lanes: 1, pET28a-*cpcB*; 2, pET28a-pelB-*cpcB*; 3, pET28a-KP-SP-*cpcB*; 4, pET28a-PhoA-*cpcB*; 5, pET28a-OmpA-*cpcB*; 6, pET28a-MalE-*cpcB*; 7, pET28a-Lpp-*cpcB*.

**Table S1.** Recipes of the media used in this study

|                                                                                                    | LB | SOB  | SOC  | 2xYT | TB  | Superbroth |
|----------------------------------------------------------------------------------------------------|----|------|------|------|-----|------------|
| Tryptone (g/L)                                                                                     | 10 | 20   | 20   | 16   | 12  | 32         |
| Yeast extract (g/L)                                                                                | 5  | 5    | 5    | 10   | 24  | 20         |
| NaCl (g/L)                                                                                         | 10 | 0.58 | 0.58 | 5    | -   | 5          |
| Glycerol (ml/L)                                                                                    | -  | -    | -    | -    | 4   | -          |
| Phosphate buffer<br>(0.17 M $\text{KH}_2\text{PO}_4$ ,<br>0.72 M $\text{K}_2\text{HPO}_4$ ) (ml/L) | -  | -    | -    | -    | 100 | -          |
| KCl (g/L)                                                                                          | -  | 1.9  | 1.9  | -    | -   | -          |
| $\text{MgCl}_2$ (g/L)                                                                              | -  | 0.95 | 0.95 | -    | -   | -          |
| $\text{MgSO}_4$ (g/L)                                                                              | -  | 1.21 | 1.21 | -    | -   | -          |
| Glucose (g/L)                                                                                      | -  | -    | 3.6  | -    | -   | -          |

**Table S2.** Plasmids and strains used in this work

| Plasmid/strain | Relevant characteristics                           | Sources or references |
|----------------|----------------------------------------------------|-----------------------|
| Plasmid        |                                                    |                       |
| pET28a(+)      | Plasmid for gene expression, Kanamycin resistance  | Lab stock             |
| pET21c(+)      | Plasmid for gene expression, Ampicillin resistance | Lab stock             |

|                          |                                                                                                                      |           |
|--------------------------|----------------------------------------------------------------------------------------------------------------------|-----------|
| pETDuet-1                | Plasmid for gene expression, Ampicillin resistance                                                                   | Lab stock |
| pACYCDDuet-1             | Plasmid for gene expression, Chloramphenicol resistance                                                              | Lab stock |
| pHP                      | pET21c(+) containing <i>ho1</i> and <i>pcyA</i> , whose expressions are regulated by T7 promoter                     | This work |
| pDHP                     | pETDuet-1 containing <i>ho1</i> and <i>pcyA</i> , whose expressions are regulated by T7 promoter                     | This work |
| pAHP                     | pACYCDDuet-1 containing <i>ho1</i> and <i>pcyA</i> , whose expressions are regulated by T7 promoter                  | This work |
| pFEA                     | pET28a(+) containing <i>cpcF</i> , <i>cpcE</i> and <i>cpcA</i> , whose expressions are regulated by T7 promoter      | This work |
| pBS                      | pET28a(+) containing <i>cpcB</i> and <i>cpcS</i> , whose expressions are regulated by T7 promoter                    | This work |
| pBT                      | pET28a(+) containing <i>cpcB</i> and <i>cpcT</i> , whose expressions are regulated by T7 promoter                    | This work |
| pET28a-sp- <i>cpcA</i>   | pET28a- <i>cpcA</i> carrying N20, OmpA, pelB, LPP, PhoA, MalE, Kp-SP signal peptide, respectively.                   | This work |
| pET28a-sp- <i>cpcB</i>   | pET28a- <i>cpcB</i> carrying OmpA, pelB, LPP, PhoA, MalE, Kp-SP signal peptide, respectively.                        | This work |
| pFENA                    | pET28a(+) containing <i>cpcF</i> , <i>cpcE</i> and N20- <i>cpcA</i> , whose expressions are regulated by T7 promoter | This work |
| pPBT                     | pET28a(+) containing <i>phoA-cpcB</i> and <i>cpcT</i> , whose expressions are regulated by T7 promoter               | This work |
| pMBT                     | pET28a(+) containing <i>malE-cpcB</i> and <i>cpcT</i> , whose expressions are regulated by T7 promoter               | This work |
| Strain                   |                                                                                                                      |           |
| <i>E. coli</i> DH5α      | The cloning host for plasmid construction                                                                            | Lab stock |
| <i>E. coli</i> BL21(DE3) | The expression host for protein expression                                                                           | Lab stock |
| BL21/pHP                 | <i>E. coli</i> BL21(DE3) carrying pET21c- <i>ho1-pcyA</i> plasmid                                                    | This work |

|                      |                                                                                                                                        |           |
|----------------------|----------------------------------------------------------------------------------------------------------------------------------------|-----------|
| BL21/pFEA/pHP        | <i>E. coli</i> BL21(DE3) carrying pET21c- <i>hol-pcyA</i> and pET28a- <i>cpcF-cpcE-cpcA</i> plasmids                                   | This work |
| BL21/pFENA/pHP       | <i>E. coli</i> BL21(DE3) carrying pET21c- <i>hol-pcyA</i> and pET28a- <i>cpcF-cpcE-N20-cpcA</i> plasmids                               | This work |
| BL21/pBS/pHP         | <i>E. coli</i> BL21(DE3) carrying pET21c- <i>hol-pcyA</i> and pET28a- <i>cpcB-cpcS</i> plasmids                                        | This work |
| BL21/pBT/pHP         | <i>E. coli</i> BL21(DE3) carrying pET21c- <i>hol-pcyA</i> and pET28a- <i>cpcB-cpcT</i> plasmids                                        | This work |
| BL21/pPBT/pHP        | <i>E. coli</i> BL21(DE3) carrying pET21c- <i>hol-pcyA</i> and pET28a- <i>phoA-cpcB-cpcT</i> plasmids                                   | This work |
| BL21/pMBT/pHP        | <i>E. coli</i> BL21(DE3) carrying pET21c- <i>hol-pcyA</i> and pET28a- <i>malE-cpcB-cpcT</i> plasmids                                   | This work |
| BL21/pFENA/pDHP      | <i>E. coli</i> BL21(DE3) carrying pETDuet- <i>hol-pcyA</i> and pET28a- <i>cpcF-cpcE-N20-cpcA</i> plasmids                              | This work |
| BL21/pFENA/pAHP      | <i>E. coli</i> BL21(DE3) carrying pACYCDuet- <i>hol-pcyA</i> and pET28a- <i>cpcF-cpcE-N20-cpcA</i> plasmids                            | This work |
| BL21/pFENA/pDHP/pAHP | <i>E. coli</i> BL21(DE3) carrying pETDuet- <i>hol-pcyA</i> , pACYCDuet- <i>hol-pcyA</i> and pET28a- <i>cpcF-cpcE-N20-cpcA</i> plasmids | This work |

**Table S3.** Primers used in this study

| Primer      | Sequence                                        |
|-------------|-------------------------------------------------|
| OL-cpcA-F   | atgaaaaccctttaactgaagccgtttc                    |
| OL-cpcA-R   | acgcgtcgaccgtacgactagtctagctcagag               |
| OL-ompA-F   | ggaattccatatgaagaagaccgcaattgc                  |
| OL-OmcpA-R  | gaaacggcttcagttaaaggggtttcatggcctgtgcaacgggtggc |
| OL-pelB-F   | ggaattccatatgaaatatctgctgccgaccg                |
| OL-PecpcA-R | cggcttcagttaaaggggtttcattgccatggccggctggg       |
| OL-Lpp-F    | ggaattccatatgaaagcaaccaaactggtgc                |
| OL-LpcpcA-R | gaaacggcttcagttaaaggggtttcataccggccagcagggtg    |
| OL-PhoA-F   | ggaattccatatgaaacagagcaccattgcac                |
| OL-PhcpcA-R | cggcttcagttaaaggggtttcatggcttggtcaccgggg        |
| OL-malE-F   | ggaattccatatgaaaattaagaccggtgcacg               |
| OL-MacpcA-R | gaaacggcttcagttaaaggggtttcattgccagtgcacttgcgc   |
| OL-KpSP-F   | ggaattccatatgagtcgccgtgcacc                     |
| OL-KpcpcA-R | gaaacggcttcagttaaaggggtttcatagcgctggcggcctg     |
| OL-cpcB-F   | atgtttgatgtgtttaccgcgtgg                        |
| OL-cpcB-R   | acgcgtcgacactagtttacgccaccgc                    |
| OL-OmcpB-R  | ccacgcgggtaaacacatcaaacatggcctgtgcaacgggtggc    |
| OL-PecpcB-R | ccacgcgggtaaacacatcaaacattgccatggccggctggg      |
| OL-LpcpcB-R | caccacgcgggtaaacacatcaaacataccggccagcagggtg     |
| OL-PhcpcB-R | ccacgcgggtaaacacatcaaacatggcttggtcaccggggt      |
| OL-MacpcB-R | ctcaccacgcgggtaaacacatcaaacattgccagtgcacttgcgct |
| OL-KpcpcB-R | caccacgcgggtaaacacatcaaacatagcgctggcggcctg      |

**Table S4.** Codon optimized gene sequences used in this study

| gene        | sequences                                                                                                                                                                                                                                                                                                                                                                                                                                                                                                                                                                                                                                                                                                                                                                                                                                                              |
|-------------|------------------------------------------------------------------------------------------------------------------------------------------------------------------------------------------------------------------------------------------------------------------------------------------------------------------------------------------------------------------------------------------------------------------------------------------------------------------------------------------------------------------------------------------------------------------------------------------------------------------------------------------------------------------------------------------------------------------------------------------------------------------------------------------------------------------------------------------------------------------------|
| <i>cpcE</i> | atgagcgaaccgaatctgaacccggcggtatactctggatcaggcgattgcgaacctgcagcagaccgaagatgcgagcg<br>cgcgttattatcgggcgtggtggattggtcgttttcgcggcgcaacctgaaactattgcggcgctgttagtggcgctgga<br>agatgaaaccgatcgagcccggatggtggtatccgctcgcgcgaatgcggcaaaagcgttaggcaaaactgggcgat<br>cgtaagtgtgcccggcgttaattaaagcgtggagtgcaagattattatgtcgcgaaaagcgagcacaggcgtagaa<br>ggcttaggtgatgcacgtgcaatggcggcgctgatggcgaaattaaccggcggttagcggcgcgcaattagtgaag<br>gcaaacctcatctggcgagccgtatgaagcgattatgaagcgctgggcaccttacaagcgggtgaagcattggcctga<br>ttgaaccgtttctggaacattttagcccgaagtgagtgatgcggcgcgctgctgtatttcagttaaccggcgataaccg<br>ctatggcgatctgctgattaccggttagcggtaccgatttacagttacgccgcagcgcgatgatggafttaggtgcgacc<br>ggctatttacctggcgcgcaagcgattgcaaaagcgtttgcggaaaacagcctgaaactgattgcgctgcgcgattatgg<br>gcgacccatcgtaacgtcaagcgagcagcgaaagcaaacggttaagccctgcgagccgtcagattctggaactgatgg<br>atagcctgctgtaa |
| <i>cpcF</i> | atggaaggcaacagcgttgtagcccgaaattgaacgcctgattcaggcggttgaaccgcgtagcgcggcaaaa<br>ctggttggtgcggttcgtgcattagcggcgactcgtagcccttagcgggtcctcagctgactaccgtgctgcgtatacaa<br>tcctggcgcgcggttggtgcggttgatggcttaattcagattggcgatgcggcgatgactcatttactggcgaacatggat<br>ggctataactatggtgcacgtgcgtgggcaactcgtgcattgtgcaggtattggtgatccgcgtgcttagcgttactgcaag<br>aagcggcgctgaccgattttgcgttaagcgtgcgtcgtgcggcagcgaaaggttaggctttctgcgctggcaagcgttac<br>cgcaggaagaacaggaaccgtgcagaaagcgatttatgataccctgattcaggtgtgcgaagatccggaatgggtggtt<br>cgctatggtgcgattgcggcgctggaaaacttagcgaaacaggcgagcattatgccagccgctgaaagattttctgca<br>gagctttgtggaacaggaaccggaaagcgattgtggcggaacgcattctgtggaccctggaaaacattggcccgaattga                                                                                                                                                                                  |
| <i>cpcB</i> | atgtttgatgtgttaccgcgtggtgagccaggcggtatgcgcgtggtgaataattaaagcggcagccagctggatgcgctg<br>agcgcgactgttgcggaaggtaataaacgcattgatagcgtgaatcgattaccggcaatgcgagcgcgattgtgagcaa<br>tgcggcgcgcgcttatttgcggaacaaccacagttgattcagccggcgggcgaatgcgtataccagccgccgatggca<br>gcgtgtttacgtgatatggaattattctgcgctatgtgacctatgcgacctttaccggcgatgcgagcgtgctggaagatcg<br>ctgtttaaattggcctgcgcgaaacctatgtgcgctggcggttccaggtgcgagcgttcagcaggtgttcaaaaaatgaa<br>agaagcggcgctggatattgtgaatgatccgaatggcattaccgcggcgattgcagcgcaattgttcgggaaattgcgg<br>gctattttgatcgcgcggcgggcggtggcgtaa                                                                                                                                                                                                                                                                                                               |
| <i>cpcS</i> | atgcagagctttcggtatgcgaaagaatttttcagtagcgcgggcccagtggcagagccgctgttacccatcatctgc<br>cgtttcgccgtgcggaagcggcggttcaaattcaagtggaaaccctggaaaaagacgacccgcgcatattgaaattt<br>gccagatgatgatattggacgcgagcctgagcgtggcggttagctatgttacctggcggggtaccatgcaatgggataa<br>agatgatgaaaaccacgagggcagcaccgtgtttgcgctgattccggatgcggataaccgcgcaaggtaaactgctg<br>cgtgaacgcggttatgcggaattgtccgggtggcggtgaatatcatctggatcatgaagatggcctggtgctgaccacc<br>gaatatgaaaccatgaccatttatgagcgttctggtttgcgaaccggatctgcgttacgcaccagcactgttaaacgctt<br>tggtggctttaaccaccacattttgcatggaagaacgcattcagaccagcccgtgaccgcgaccgcagcggcagaa<br>accaatcctttatatgcgattagcggtggttaa                                                                                                                                                                                                                                        |
| <i>cpcT</i> | atgagccatagcaccgatttaagcgcgctggcgcggttgatggcgggcggttttagcaatcaggcgagcggtttgaaaa<br>tccgccgttttatgcgcatattcgcgtggcgattcggcggttgatcaggcgaaatttggcgatgcctgctgtttctggaac<br>aggcgatgatatttatgctgcagcgcccgtatgcctgcgcgttttgaaattaaaagtgttggaagatcacatcgagatcga<br>gaacttcaaagtgaagacgaggaagaattctacggcgcgcgcgatattaggcaattagcgagttaacccagcg<br>gatctggaaccaatgcatggctgcgatattgtggaatggaccggcaccagctttaaaggcgaaagtgcagccggggcc<br>gccaatccgctgttatgcgtgatgtaagaaacctatctggaataatagcttcgaggtgagcgaaccggcgctgattagcc<br>tggtatcgcggtatgatccggaaccaatgaacgcgtgtggggcagcgttgcgggtgcgtttcattttgtgcgctggcaga<br>gctttgcggatgaagtgcgttttaa                                                                                                                                                                                                                                          |

---

*hol* atgagcgttaatctggccagtcagctgctgaaggtagcaaaaaatcacatagcatggcagaaaaatgtgggctttgttaaat  
gctttctgaaaggcgtgggaaaagaatagctatcgtaaactggggcaatctgtattttgtgtatagtgaatggaagaa  
gaaatggcaaaattcaaagatcatccgattctgagccatatctattttccggaactgaatcgtaaacagagctggaacagg  
atctgcagttttattatggcagtaattggcgtcaggaaagttaaattagtgccgccggtcaggcctatgtggatcgctgcgc  
caggttgagccaccgcacctgaactgctggtgcacatagctatacccgtatctgggcgatctgagtggtggtcagattc  
tgaaaaagattgcacagaatgcaatgaatctgcatgatggtggtagccctttatgaatttgccgatattgatgatgagaaa  
gcattcaaaaacacctatcgtagggcatgaatgatctgccgattgatcaggcaaccgcagaacgcattgtggatgaagcc  
aatgatgcatttgcaatgaatatgaaaatgtcaacgagctggaaggtaatctgattaaggccattggcattatggtgttaata  
gtctgacccgccgtcgtagtcagggtagcaccgaagtgggtctggccaccagcgaaggctaa

---

*pcyA* atggcagtgaccgatctgagcctgaccaatagcagctgatgccgaccctgaatccgatgattcagcagctggcactggc  
aattgccgccagctggcagagctctccgctgaaaccgtatcagctgccggaagatctgggctatgtggaaggctgcctgg  
aagggtgaaaaactggttattgaaaatcgctgctatcagaccccgagtttcgaaaatgcattctggaactggcaaaagtgg  
caaaggcctggatattctgcattgtgtgatgtttccggaaccgctgatggcctgccgctgtttggctgtgatattgtggccgg  
ccggggcggttagtcagcaattgccgatctgagccgaccagagtgatgccagctgccggcagcatatcagaaa  
agtctggccgaactgggccagccggaattgaacagcagcgcgaactgccgccgtggggtgaaatttttagcgaatattgt  
ctgtttatccgtccgagcaatgtgaccgaagaagaacgctttgttcagcgtgtgttggttttctgcagattcattgtcatcaga  
gtattgttcagaaccgctgagtgaaagccagaccctggaacatgccagggccagattcattattgtcagcagcagcag  
aaaaatgataaaacccgccgcttctggaaaaagcatttggtgaagcctgggccgaacgctatatgagtcaggtgctgttt  
gatgttattcagtaa

---
